# Supplementary figures and images for: Identification of the Keratin-Associated Protein 22-2 Gene in the Capra hircus and Association of Its Variation with Cashmere Traits
Source: MDPI journal article supplement (doi:10.3390/ani13172806), 2023-09-04

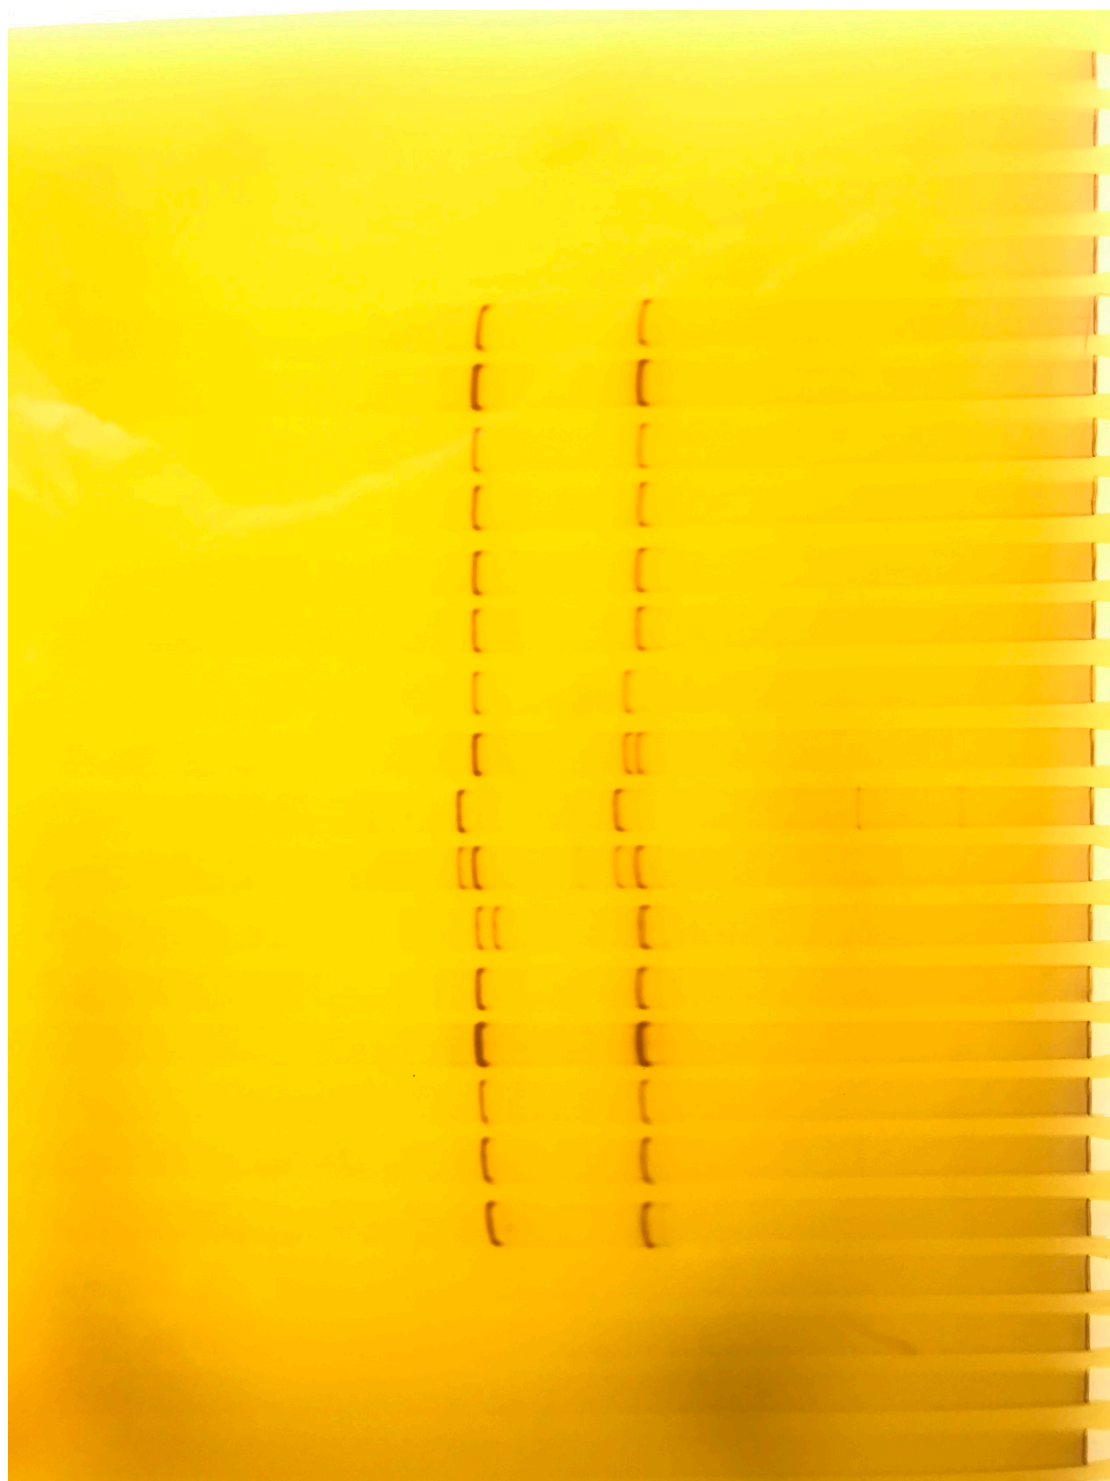

Supplement: s1 [file s1]
